# Supplementary material
Source: PubMed Central journal article supplement (PMC5890882)
Supplement: NIHMS76854-supplement-Figure_S1.pdf [file NIHMS76854-supplement-Figure_S1.pdf]

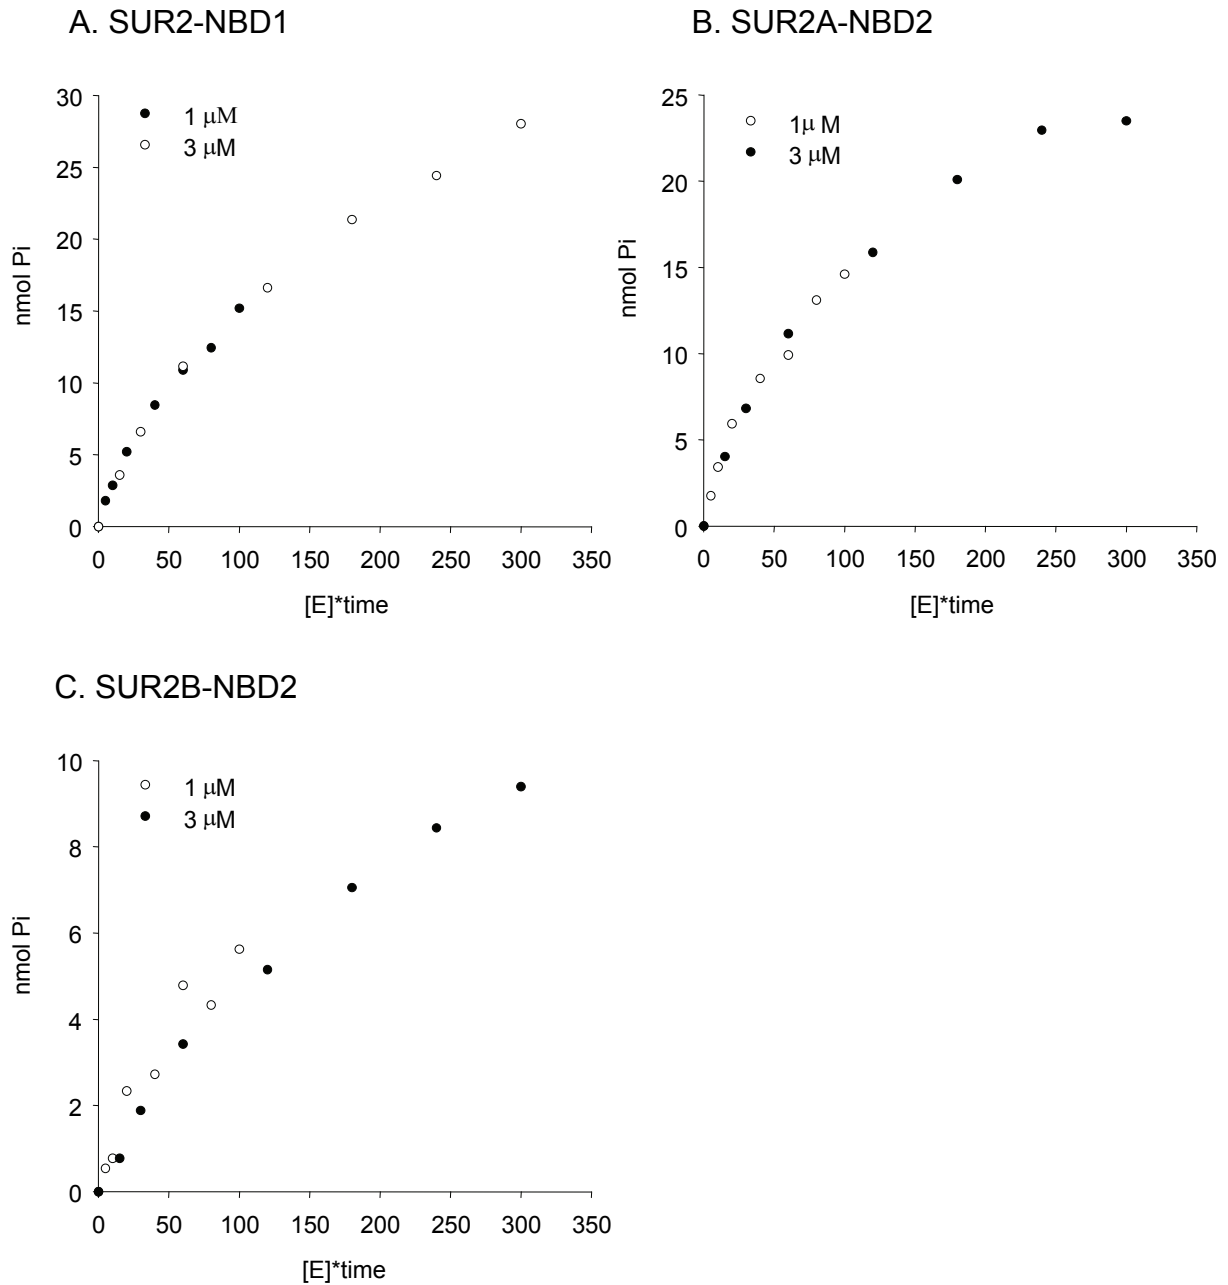

Selwyn's test: NBDs at 1 and 3 μM in the presence of 1 mM MgATP at times 0, 5, 10, 20, 40, 60, 80 and 100 min. (Note that all the points lie on the same curve and that the different concentrations of protein did not yield two different curves.)
